# Supplementary material
Source: HighWire-hosted journal article supplement (https://bmjopen.bmj.com/content/11/9/e052655)
Supplement: inline-supplementary-material-1 [file inline-supplementary-material-1.pdf]

**Supplementary file 1**

The English version of PCPCM

**‘The Person-Centered Primary Care Measure’****Measuring what Matters in Primary Care**

Please circle the response that best fits your experience for each item. Thank you.

| <b>PATIENT’S GENERAL ASSESSMENT OF TODAY’S VISIT</b>                      | <b>RESPONSE</b>                       |
|---------------------------------------------------------------------------|---------------------------------------|
| The practice makes it easy for me to get care.                            | Definitely Mostly Somewhat Not at all |
| This practice is able to provide most of my care.                         | Definitely Mostly Somewhat Not at all |
| In caring for me, my doctor considers all factors that affect my health.  | Definitely Mostly Somewhat Not at all |
| My practice coordinates the care I get from multiple places.              | Definitely Mostly Somewhat Not at all |
| This doctor or practice knows me as a person.                             | Definitely Mostly Somewhat Not at all |
| My doctor and I have been through a lot together.                         | Definitely Mostly Somewhat Not at all |
| My doctor or practice stands up for me.                                   | Definitely Mostly Somewhat Not at all |
| The care I get takes into account knowledge of my family.                 | Definitely Mostly Somewhat Not at all |
| The care I get in this practice is informed by knowledge of my community. | Definitely Mostly Somewhat Not at all |
| Over time, this practice helps me to meet my goals.                       | Definitely Mostly Somewhat Not at all |
| Over time, my practice helps me stay healthy.                             | Definitely Mostly Somewhat Not at all |
| <b>PLEASE TELL US A BIT ABOUT YOURSELF</b>                                |                                       |
| How many years have you known this doctor?                                | _____ (number of years)               |
