# Supplementary material
Source: HighWire-hosted journal article supplement (https://bmjopen.bmj.com/content/11/9/e052655)
Supplement: inline-supplementary-material-1 [file inline-supplementary-material-1.pdf]

**Supplementary file 1**

The English version of PCPCM

## **‘The Person-Centered Primary Care Measure’**

### **Measuring what Matters in Primary Care**

Please circle the response that best fits your experience for each item. Thank you.

| PATIENT'S GENERAL ASSESSMENT OF TODAY'S VISIT                             | RESPONSE                                    |
|---------------------------------------------------------------------------|---------------------------------------------|
| The practice makes it easy for me to get care.                            | Definitely   Mostly   Somewhat   Not at all |
| This practice is able to provide most of my care.                         | Definitely   Mostly   Somewhat   Not at all |
| In caring for me, my doctor considers all factors that affect my health.  | Definitely   Mostly   Somewhat   Not at all |
| My practice coordinates the care I get from multiple places.              | Definitely   Mostly   Somewhat   Not at all |
| This doctor or practice knows me as a person.                             | Definitely   Mostly   Somewhat   Not at all |
| My doctor and I have been through a lot together.                         | Definitely   Mostly   Somewhat   Not at all |
| My doctor or practice stands up for me.                                   | Definitely   Mostly   Somewhat   Not at all |
| The care I get takes into account knowledge of my family.                 | Definitely   Mostly   Somewhat   Not at all |
| The care I get in this practice is informed by knowledge of my community. | Definitely   Mostly   Somewhat   Not at all |
| Over time, this practice helps me to meet my goals.                       | Definitely   Mostly   Somewhat   Not at all |
| Over time, my practice helps me stay healthy.                             | Definitely   Mostly   Somewhat   Not at all |
| <b>PLEASE TELL US A BIT ABOUT YOURSELF</b>                                |                                             |
| How many years have you known this doctor?                                | _____ (number of years)                     |
